# Supplementary material
Source: PubMed Central journal article supplement (PMC6865811)

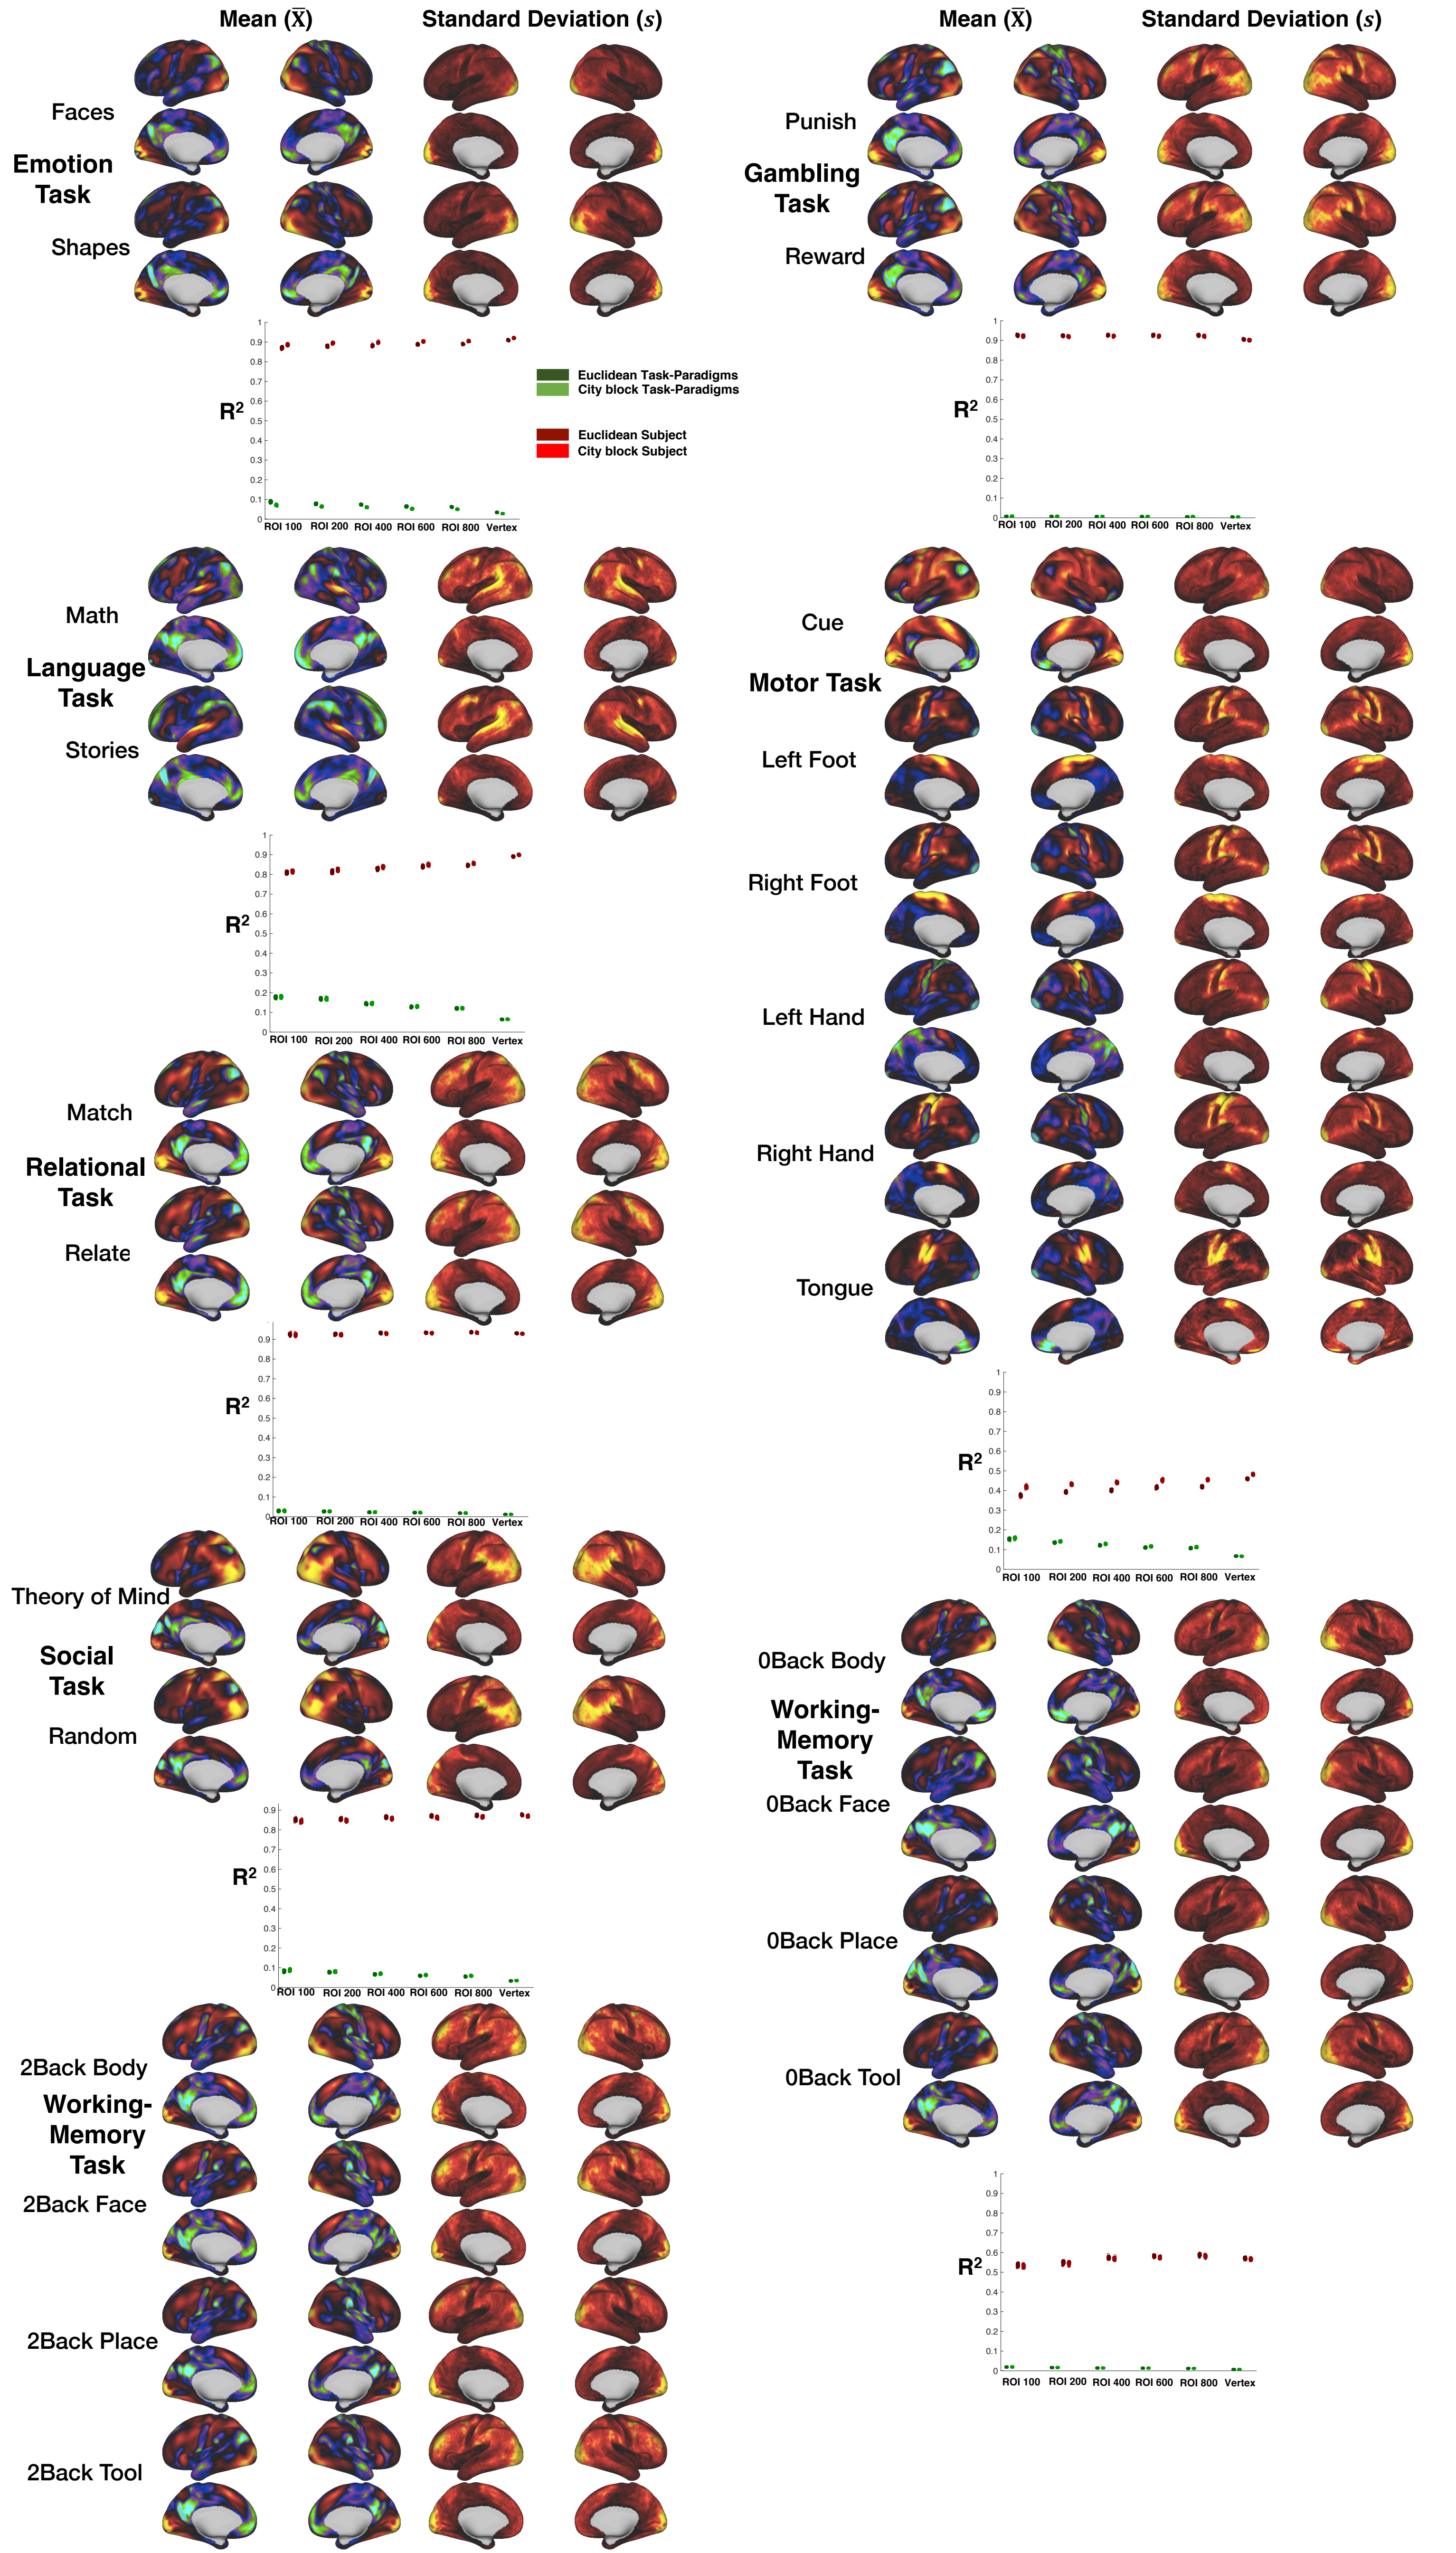

Supplement: HBM-40-2943-s001.pdf [file HBM-40-2943-s001.pdf]

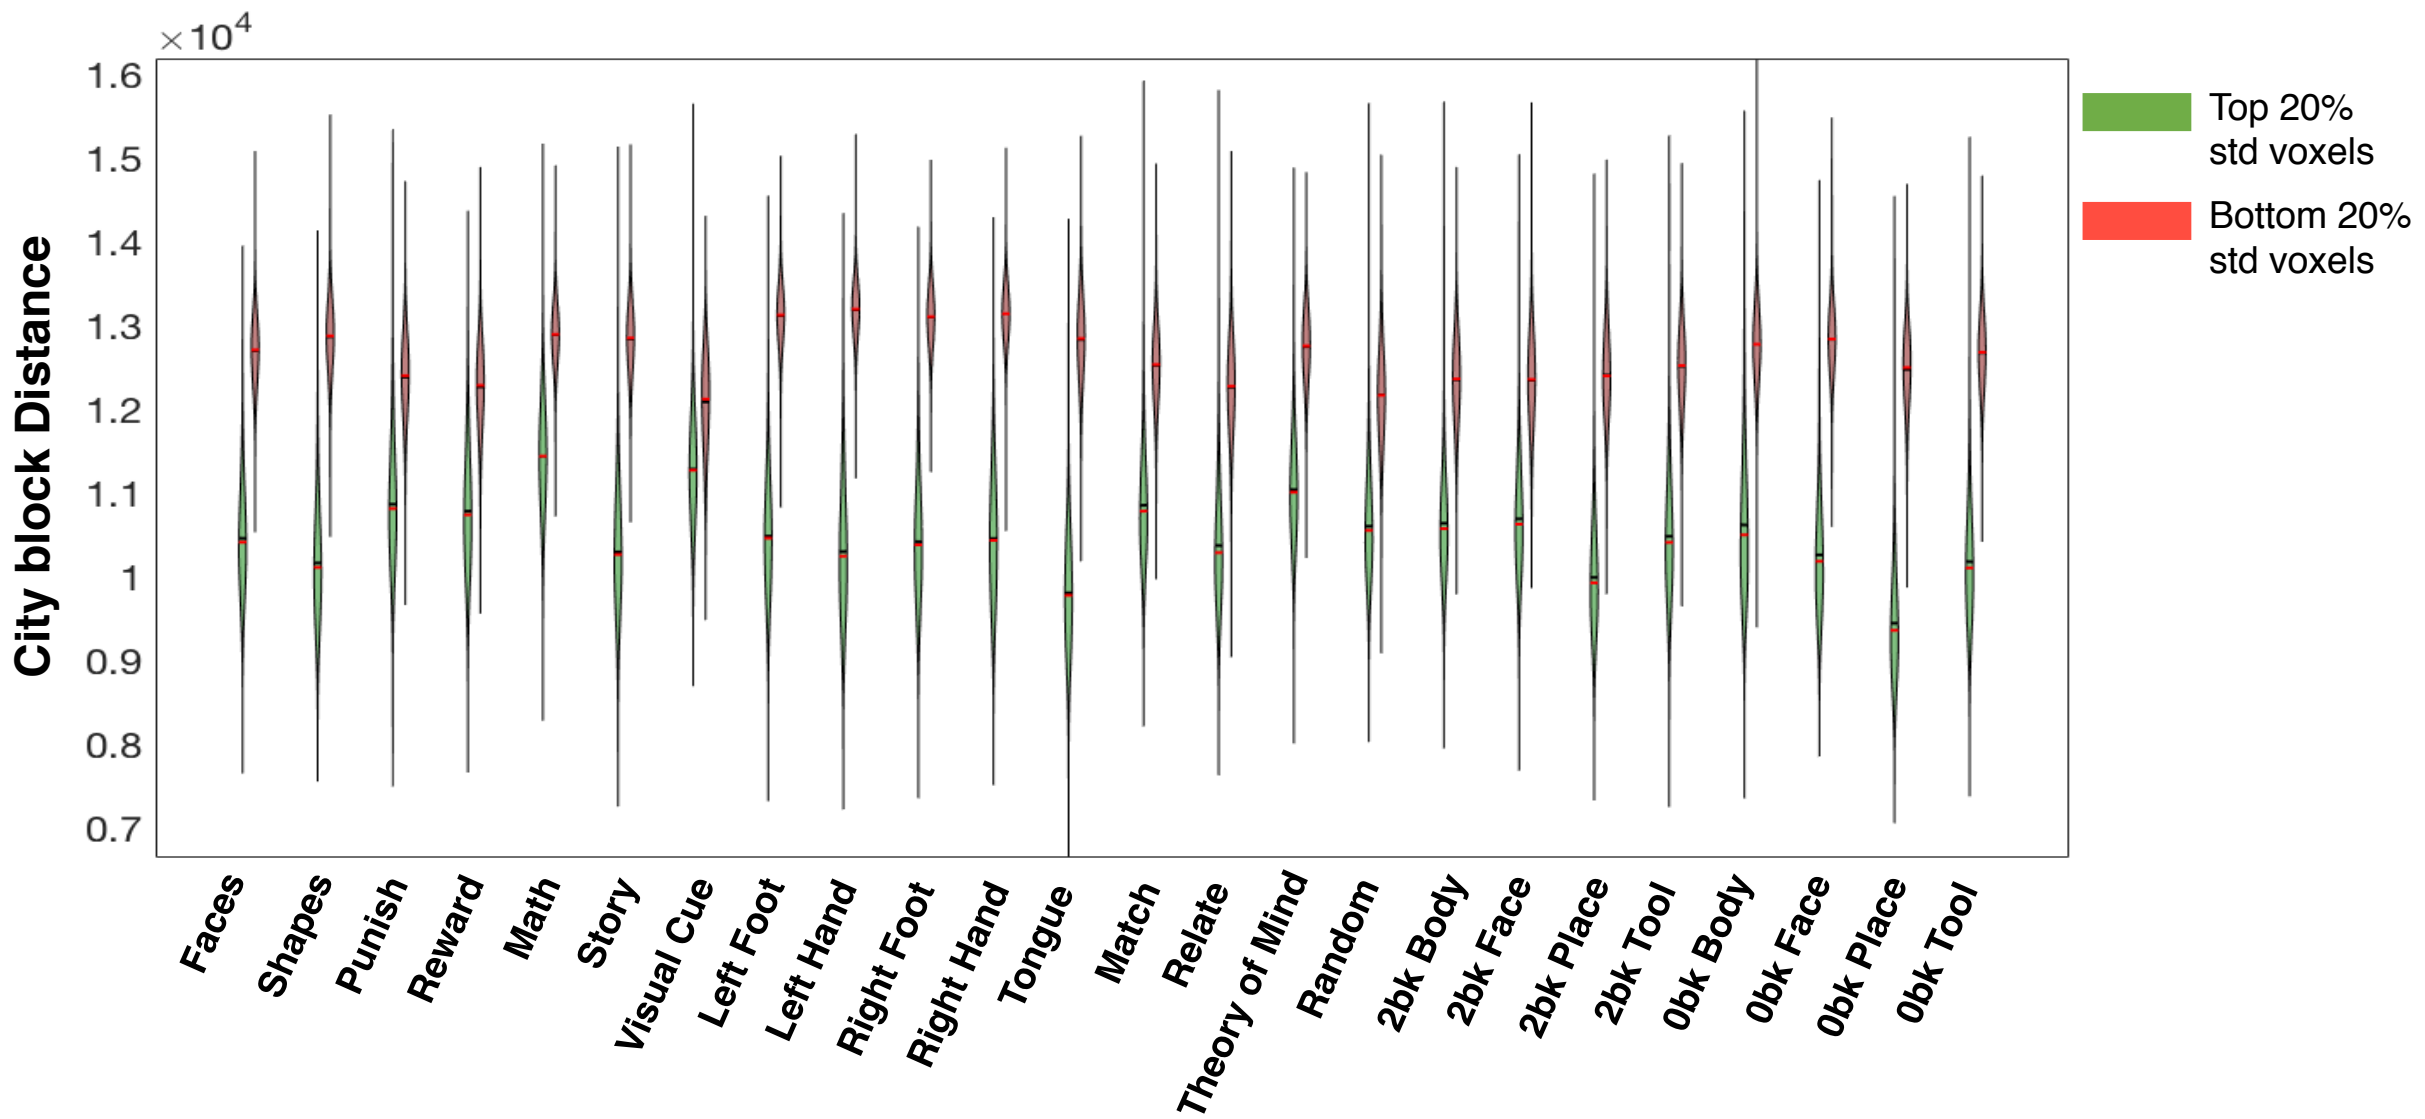

Supplement: HBM-40-2943-s002.pdf [file HBM-40-2943-s002.pdf]
